# Supplementary material
Source: PubMed Central journal article supplement (PMC3357909)
Supplement: supp_139.12.2150_DEV077065AppendixS1.pdf [file supp_139.12.2150_DEV077065AppendixS1.pdf]

## Appendix 1 - Mathematical Modeling Parameters

We model the retinoic acid (RA) signaling system in the zebrafish hindbrain with chemical reactions, assuming diffusion of extracellular RA. A one-dimensional domain represents the anterior-posterior (A-P) axis of the hindbrain. The concentration of extracellular RA is represented by  $[RA]_{out}$ , intracellular RA by  $[RA]_{in}$ , binding proteins (Crabps) by  $[BP]$ , RA receptors by  $[R]$ , the RA degradation enzyme Cyp26a1 by  $[Cyp]$ , and Fgf by  $[fgf]$ . There are also two complexes that can form,  $[RA - R]$  and  $[RA - BP]$ . The strength of the RA signal is represented by  $[RA - R]^n$ . We let  $n=2$  assuming co-operativity in signaling (White et al. 2007). The RA signal  $[RA - R]$  is formed when  $[RA]_{in}$  binds to  $[R]$  or when  $[RA - BP]$  binds to receptors  $[R]$ . We assume that  $[RA - BP - R]$  is at quasi-equilibrium and is short-lived which simplifies the reaction

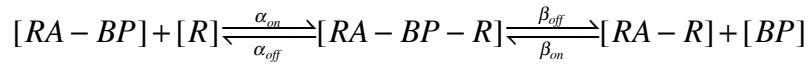

to

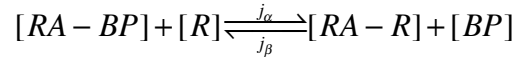

where

$$j_{\alpha} = \frac{\beta_{off} \alpha_{on}}{\alpha_{off} + \beta_{off}}$$

and

$$j_{\beta} = \frac{\beta_{on} \alpha_{off}}{\alpha_{off} + \beta_{off}},$$

in the model. Molecules can degrade in both bound and unbound forms, with possibly different rates. For example, the complex  $[RA - BP]$  may undergo either  $[RA]$  degradation or  $[BP]$  degradation. The  $[RA - R]$  complex may only undergo  $[R]$  degradation because the receptors are located inside the nucleus and we assume that RA can only be degraded outside the nucleus through interacting with  $[Cyp]$ .

In the domain  $0 \leq X \leq x_f$ , we let

$$\begin{aligned}
\frac{\partial[RA]_{out}}{\partial T} &= D \frac{\partial^2[RA]_{out}}{\partial X^2} + V(x) - (1 + \beta)k_p[RA]_{out} + k_p[RA]_{in}, \\
\frac{\partial[RA]_{in}}{\partial T} &= k_p[RA]_{out} + r_{deg2}[RA - R] + bp_{deg2}[RA - BP] - [CYP]_{RA}[RA]_{in} - k_p[RA]_{in} \\
&\quad - r_{on}[RA]_{in}[R] + r_{off}[RA - R] - m_{on}[RA]_{in}[BP] + m_{off}[RA - BP], \\
\frac{\partial[R]}{\partial T} &= V_R - r_{deg1}[R] - r_{on}[RA]_{in}[R] + r_{off}[RA - R] - j_\alpha[RA - BP][R] + j_\beta[BP][RA - R], \\
\frac{\partial[RA - R]}{\partial T} &= r_{on}[RA]_{in}[R] - r_{off}[RA - R] + j_\alpha[RA - BP][R] - j_\beta[BP][RA - R] - r_{deg2}[RA - R], \\
\frac{\partial[BP]}{\partial T} &= V_{BP} - bp_{deg1}[BP] + [CYP]_{RABP}[RA - BP] \\
&\quad - m_{on}[RA]_{in}[BP] + m_{off}[RA - BP] + j_\alpha[RA - BP][R] - j_\beta[BP][RA - R], \\
\frac{\partial[RA - BP]}{\partial T} &= -[CYP]_{RABP}[RA - BP] + m_{on}[RA]_{in}[BP] - m_{off}[RA - BP] \\
&\quad - j_\alpha[RA - BP][R] + j_\beta[BP][RA - R] - bp_{deg2}[RA - BP], \tag{0.1}
\end{aligned}$$

where

$$[Fgf] = f_0 \exp(-\lambda(X - x_f))$$

and

$$[CYP]_j = C_0 \begin{cases} \left( \frac{RA_{signal}}{RA_{signal} + \gamma^n(\delta + [Fgf])} \right), & 0 < X < x_f - 40, \\ 1, & X > x_f - 40, \end{cases}$$

with the coefficient  $C_0 = ra_{deg}$ , for  $j = RA$ , and  $C_0 = rabp_{deg}$ , for  $j = RABP$ .

A smaller region of interest than that of (White et al. 2007) is used, with  $X=0$  corresponding to the posterior border of the anterior domain of high *cyp26a1* expression. The source of RA is posterior to the hindbrain so we let  $V(X) = V_{RA}$  at  $X > x_f - 40$ , and  $V(X) = 0$  otherwise. The anterior region has a no flux boundary condition

$$\frac{\partial [RA]_{out}}{\partial X} = 0 \text{ at } X = 0$$

and the posterior region has a leaky boundary condition

$$\frac{\partial [RA]_{out}}{\partial X} = -k_p [RA]_{out} \text{ at } X = x_f .$$
