# Supplementary material
Source: PubMed Central journal article supplement (PMC3357909)
Supplement: supp_139.12.2150_DEV077065AppendixS2.pdf [file supp_139.12.2150_DEV077065AppendixS2.pdf]

## Appendix 2 - Numerical Methods

A dimensionless form of the model is obtained by applying the following scales,

$$\tau = x_{\max}^2 / D, X = x_{\max} x, T = \tau t,$$

$$\{a, b, c, d, e, f\} = \{[RA]_{out}, [RA]_{in}, [R], [RA - R], [BP], [RA - BP]\} / c_0.$$

We use the following set of lumped parameters for clarity,

$$\{V_{bp}, V_r, V_{ra}\} = \tau / c_0 \{V_{BP}, V_R, V_{RA}\},$$

$$k_1 = \tau k_p, \{k_2, k_6\} = \tau c_0 \{ra_{deg}, rabp_{deg}\},$$

$$\{k_{41}, k_{42}, k_{51}, k_{52}\} = \tau \{r_{deg1}, r_{deg2}, dp_{deg1}, dp_{deg2}\},$$

$$\{r_1, r_2, m_1, m_2, j_1, j_2\} = \tau \{c_0 r_{on}, r_{off}, c_0 m_{on}, m_{off}, c_0 j_{on}, j_{off}\}.$$

The model reduces to

$$\begin{aligned} \frac{\partial a}{\partial t} &= \frac{\partial^2 a}{\partial x^2} + v(x) - (1 + \beta)k_1 a + k_1 b, \\ \frac{\partial b}{\partial t} &= k_1 a - (k_2[cyp] + k_1)b - r_1 bc + r_2 d - m_1 be + m_2 f + k_{42} d + k_{52} f, \\ \frac{\partial c}{\partial t} &= V_r - k_{41} c - r_1 bc + r_2 d - j_1 fc + j_2 ed, \\ \frac{\partial d}{\partial t} &= r_1 bc - r_2 d + j_1 fc - j_2 ed - k_{42} d, \\ \frac{\partial e}{\partial t} &= V_{bp} - k_{51} e + k_6[cyp]f - m_1 be + m_2 f + j_1 fc - j_2 ed, \\ \frac{\partial f}{\partial t} &= -j_1 fc + j_2 ed + m_1 be - m_2 f - k_6[cyp]f - k_{52} f. \end{aligned} \tag{0.1}$$

Because we are concerned with RA signal gradient formation at the gastrula stage, the system can be assumed to be at a steady state. Therefore, we solve the model at the steady state. The model reduces to a boundary value problem with respect to  $a$ ,

$$0 = D \frac{d^2 a}{dx^2} + v(x) - (1 + \beta)k_1 a + k_1 b, \tag{0.2}$$

and five algebraic equations at the steady state.

The boundary value problem is solved using a fourth order Runge-Kutta method together with the shooting method. The values  $b$ ,  $d$  and  $f$  are obtained by finding the roots of the equations,

$$0 = r_1 bc - r_2 d + j_1 fc - j_2 ed - k_{42} d, \tag{0.3}$$

$$0 = -j_1 fc + j_2 ed + m_1 be - m_2 f - k_6[cyp]f - k_{52} f, \tag{0.4}$$

$$0 = k_1 a - [cyp](k_2 b + k_6 f) - k_1 b. \tag{0.5}$$

These values then give  $e = \frac{V_{bp} - k_{52}f}{k_{51}}$ , and  $c = \frac{V_r - k_{42}d}{k_{41}}$ .

The Gauss-Newton method is used to solve the algebraic equations for  $b$ ,  $d$  and  $f$ . For simulations that do not converge (successfully find the roots of the system) using Gauss-Newton alone, we iteratively use the bisection method on (0.5) to find  $b$  and the Levenberg-Marquardt method to solve (0.3) and (0.4) for  $d$  and  $f$ . We check the validity of the steady state numerical solver by feeding its output (steady state solutions) as the inputs into a numerical solver for the entire partial differential equation model (0.1) to make sure that the solutions are indeed steady states. The full partial differential equation model was solved by a fourth order Runge-Kutta method in time and finite differences in space. All numerical methods were implemented in the C programming language.
