# Supplementary material
Source: PubMed Central journal article supplement (PMC3357909)
Supplement: supp_139.12.2150_DEV077065SuppTableS1.pdf [file supp_139.12.2150_DEV077065SuppTableS1.pdf]

## Table S1. Primers

### RT-PCR

#### *crabp1a*

Forward: AGGACAATCCGAAGCTCAAA

Reverse: CAGCAATGGCTGAGAATTGA

#### *crabp1b*

Forward: GTGAATGCGATGCTGAGAAA

Reverse: CTGTGGGCCACCTAACATCT

#### *crabp2a*

Forward: CAGGAAAAGGGCACAGTTTGA

Reverse: CTCTCTGACATAAACTCTTGACACACA

#### *crabp2b*

Forward: AAAGACGCGCAGAAACA

Reverse: ATCTCGTTCATACACCCGAGT

### Cloning

#### *crabp2a*

Forward: GCGAAGCTTGAGAGTGTTCAGGTAAAG

Reverse: CGCTCTAGACATGCAATGAAGTTTTCTGG

#### *crabp2b*

Forward: GCGGAATTCAACATTCGCGGACTTTTTCTG

Reverse: CGCCTCGAGCGTGTCCATGATGTCTCAGG

#### *crabp2a:mCherry*

Forward: CGGAATTCAGGAAAAGGGCACAGTTTGA

Reverse: GTGGAGCCTGCTTTACCCTCTCTGACATAAACTCTTGACACACA

#### *crabp2b:mCherry*

Forward: CGGAATTCAGAAAGACGCGCAGAAACA

Reverse: GTGGAGCCTGCTTTACCATCTCGTTCATACACCCGAGT

#### *mCherry*

Forward: AAAGCAGGCTCCACCATG

Reverse: GCTCTAGAGAGCTGCCAGGAAACAGCTA

All sequences are listed 5' to 3'.
