# Supplementary material
Source: PubMed Central journal article supplement (PMC3357909)
Supplement: supp_139.12.2150_DEV077065SuppTableS2.pdf [file supp_139.12.2150_DEV077065SuppTableS2.pdf]

**Table S2. Established parameter values**

| <b>Parameter</b> | <b>Range</b>               | <b>Units</b>                    | <b>Justification</b>           |
|------------------|----------------------------|---------------------------------|--------------------------------|
| $V_{RA}$         | 0.0001                     | $\mu\text{M sec}^{-1}$          |                                |
| $D$              | 18                         | $\mu\text{m}^2 \text{sec}^{-1}$ | (White et al. 2007)            |
| $k_p$            | $[10^{-5}, 10^{-3}]$       | $\text{sec}^{-1}$               | (White et al. 2007)            |
| $\beta$          | [0, 10]                    | None                            | (White et al. 2007)            |
| $f_0$            | 0.4                        | $\mu\text{M}$                   | (White et al. 2007)            |
| $\lambda$        | 0.019                      |                                 | (White et al. 2007)            |
| $n$              | 2                          |                                 | (White et al. 2007)            |
| $x_f$            | 400 $\mu\text{m}$          |                                 | (White et al. 2007)            |
| $\delta$         | 0.001                      |                                 | (White et al. 2007)            |
| $\gamma$         | $3.3 * [10^{-4}, 10^{-1}]$ |                                 | Unknown. A large range is used |
