# Supplementary material
Source: PubMed Central journal article supplement (PMC3357909)
Supplement: supp_139.12.2150_DEV077065SuppTableS3.pdf [file supp_139.12.2150_DEV077065SuppTableS3.pdf]

**Table S3. Estimated parameter values**

| Parameter    | Range                                                | Units                              | Justification                                                                                                                                                        |
|--------------|------------------------------------------------------|------------------------------------|----------------------------------------------------------------------------------------------------------------------------------------------------------------------|
| $r_{on}$     | $[10^0, 10^2]$                                       | $\mu\text{M}^{-1} \text{sec}^{-1}$ | Assume to be in a similar range as BPs                                                                                                                               |
| $r_{off}$    | $r_{on} * [10^{-5}, 10^{-3}]$                        | $\text{sec}^{-1}$                  | (Allenby et al., 1994)<br>The receptor dissociation constant is in the order of 0.1 nM (another measurement was 10 nM)                                               |
| $m_{on}$     | $[10^0, 10^2]$                                       | $\mu\text{M}^{-1} \text{sec}^{-1}$ | $5.1 * 10^1 \mu\text{M}^{-1} \text{sec}^{-1}$ (Dong et al., 1999)                                                                                                    |
| $m_{off}$    | $m_{on} * [10^{-5}, 10^{-3}]$                        | $\text{sec}^{-1}$                  | Binding proteins have less affinity with RA (greater $K_d$ ) than receptors. The $K_d$ for binding proteins is measured between 0.06 and 0.13 nM (Dong et al., 1999) |
| $j_\alpha$   | $[10^{-2}, 10^3]$                                    | $\mu\text{M}^{-1} \text{sec}^{-1}$ | Unknown. A large range is used                                                                                                                                       |
| $j_\beta$    | $[10^{-2}, 10^3]$                                    | $\mu\text{M}^{-1} \text{sec}^{-1}$ | Unknown. A large range is used                                                                                                                                       |
| $r_{deg1}$   | $[10^{-6}, 10^{-4}]$                                 | $\text{sec}^{-1}$                  | Half-life of receptors is ~4 hours                                                                                                                                   |
| $r_{deg2}$   | $r_{deg1} * [10^{-1}, 10^1]$                         | $\text{sec}^{-1}$                  | Unknown, assumed to be within range of $r_{deg1}$                                                                                                                    |
| $bp_{deg1}$  | $[10^{-6}, 10^{-4}]$                                 | $\text{sec}^{-1}$                  | Same assumption as for receptor degradation                                                                                                                          |
| $bp_{deg2}$  | $bp_{deg2} * [10^{-1}, 10^1]$                        | $\text{sec}^{-1}$                  | Same assumption as for receptor degradation                                                                                                                          |
| $ra_{deg}$   | $[1, 10^4]$                                          | $\text{sec}^{-1}$                  | $500 \text{sec}^{-1}$ was used by White et al. (White et al., 2007). Here we consider a large range                                                                  |
| $rabp_{deg}$ | $[1, 10^4]$                                          | $\text{sec}^{-1}$                  | Assume maximum degradation at the anterior region due to high Cyp26a1 concentration                                                                                  |
| $V_R$        | $\text{Min}(r_{deg1}, r_{deg2}) * [10^{-4}, 10^0]$   | $\mu\text{M} \text{sec}^{-1}$      | Receptor synthesis is assumed to be in the same range as $V_{BP}$                                                                                                    |
| $V_{BP}$     | $\text{Min}(bp_{deg1}, bp_{deg2}) * [10^{-4}, 10^0]$ | $\mu\text{M} \text{sec}^{-1}$      | The concentration of BP is $\sim 10^{-2} \mu\text{M}$ (Napoli, 1996). We use a wide range, from $10^{-4}$ to $10^0 \mu\text{M}$                                      |
